# Supplementary material for: Mesoporous graphite nanoflakes via ionothermal carbonization of fructose and their use in dye removal
Source: Royal Society of Chemistry journal article supplement (doi:10.1039/c4ra05146g), 2014-01-01
Supplement: c4ra05146g1.pdf [file c4ra05146g1.pdf]

## Supporting information

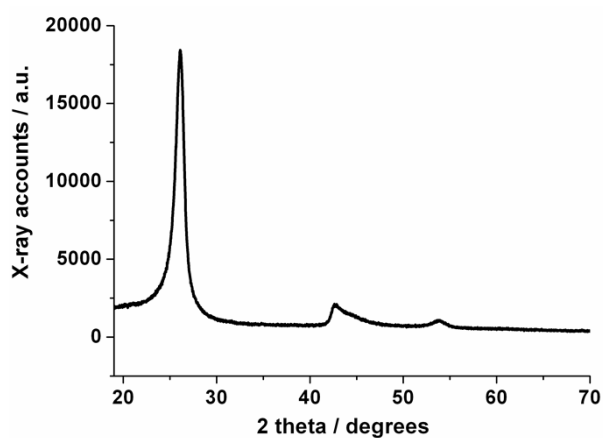

**Figure S1.** XRD pattern of ionothermal carbon after acid etching.

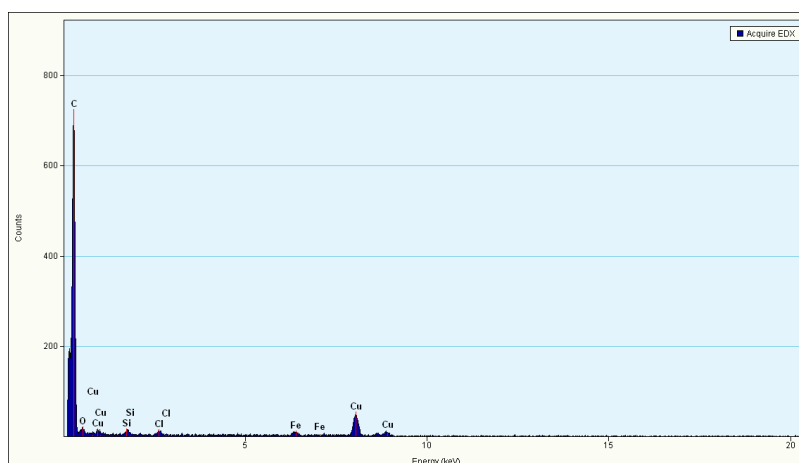

**Figure S2.** EDX analysis of OLG materials after acid etching.

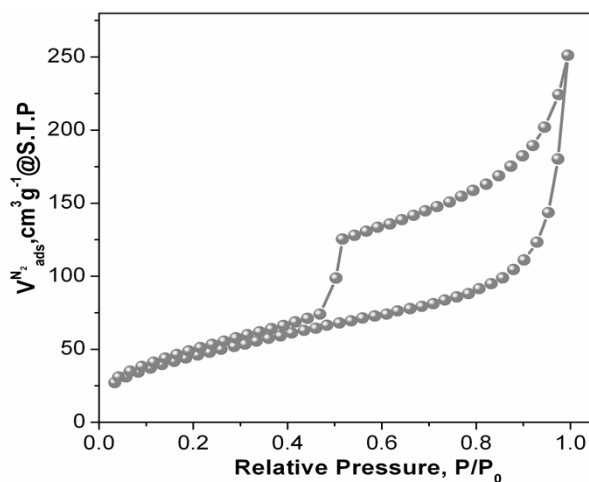

**Figure S3.** N<sub>2</sub> sorption of ionothermal carbon after acid treatment.

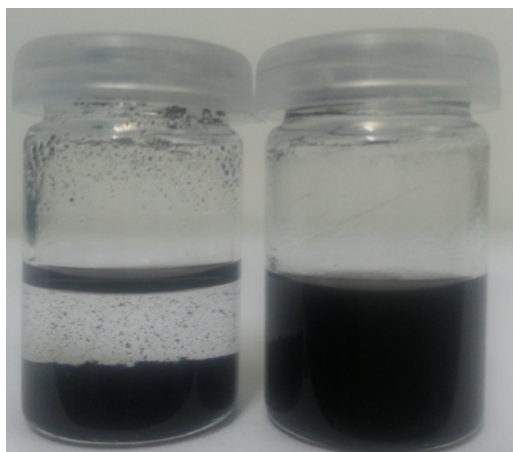

**Figure S4.** Dispersion of graphene-type nanoflake (right) in toluene. For comparison, a carbon nanotube dispersion (left) in toluene is also presented.
